# Supplementary material for: A method to preserve trends in quantile mapping bias correction of climate modeled temperature
Source: Copernicus journal article supplement (doi:10.5194/esd-8-889-2017), 2017-09-28
Supplement: Supplementary file 1 [file esd-8-889-2017-supplement.zip]

Archive with 3 entries (3 files):
- ESM.pdf
- esd-8-889-2017-supplement-title-page.pdf
- Figure_1_vid.mp4
