# Supplementary material for: A method to preserve trends in quantile mapping bias correction of climate modeled temperature
Source: Copernicus journal article supplement (doi:10.5194/esd-8-889-2017), 2017-09-28
Supplement: Supplementary file 1 [file esd-8-889-2017-supplement.zip › esd-8-889-2017-supplement-title-page.pdf]

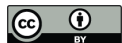

## *Supplement of*

# **A method to preserve trends in quantile mapping bias correction of climate modeled temperature**

**Manolis G. Grillakis et al.**

*Correspondence to:* Manolis G. Grillakis ([manolis@hydromech.gr](mailto:manolis@hydromech.gr))

- [esd-8-889-2017-supplement-title-page.pdf](#)
- [ESM.pdf](#)
- [Figure\\_1\\_vid.mp4](#)

The copyright of individual parts of the supplement might differ from the CC BY 3.0 License.
