# Supplementary material for: A method to preserve trends in quantile mapping bias correction of climate modeled temperature
Source: Copernicus journal article supplement (doi:10.5194/esd-8-889-2017), 2017-09-28
Supplement: Supplementary file 1 [file esd-8-889-2017-supplement.zip › ESM.pdf]

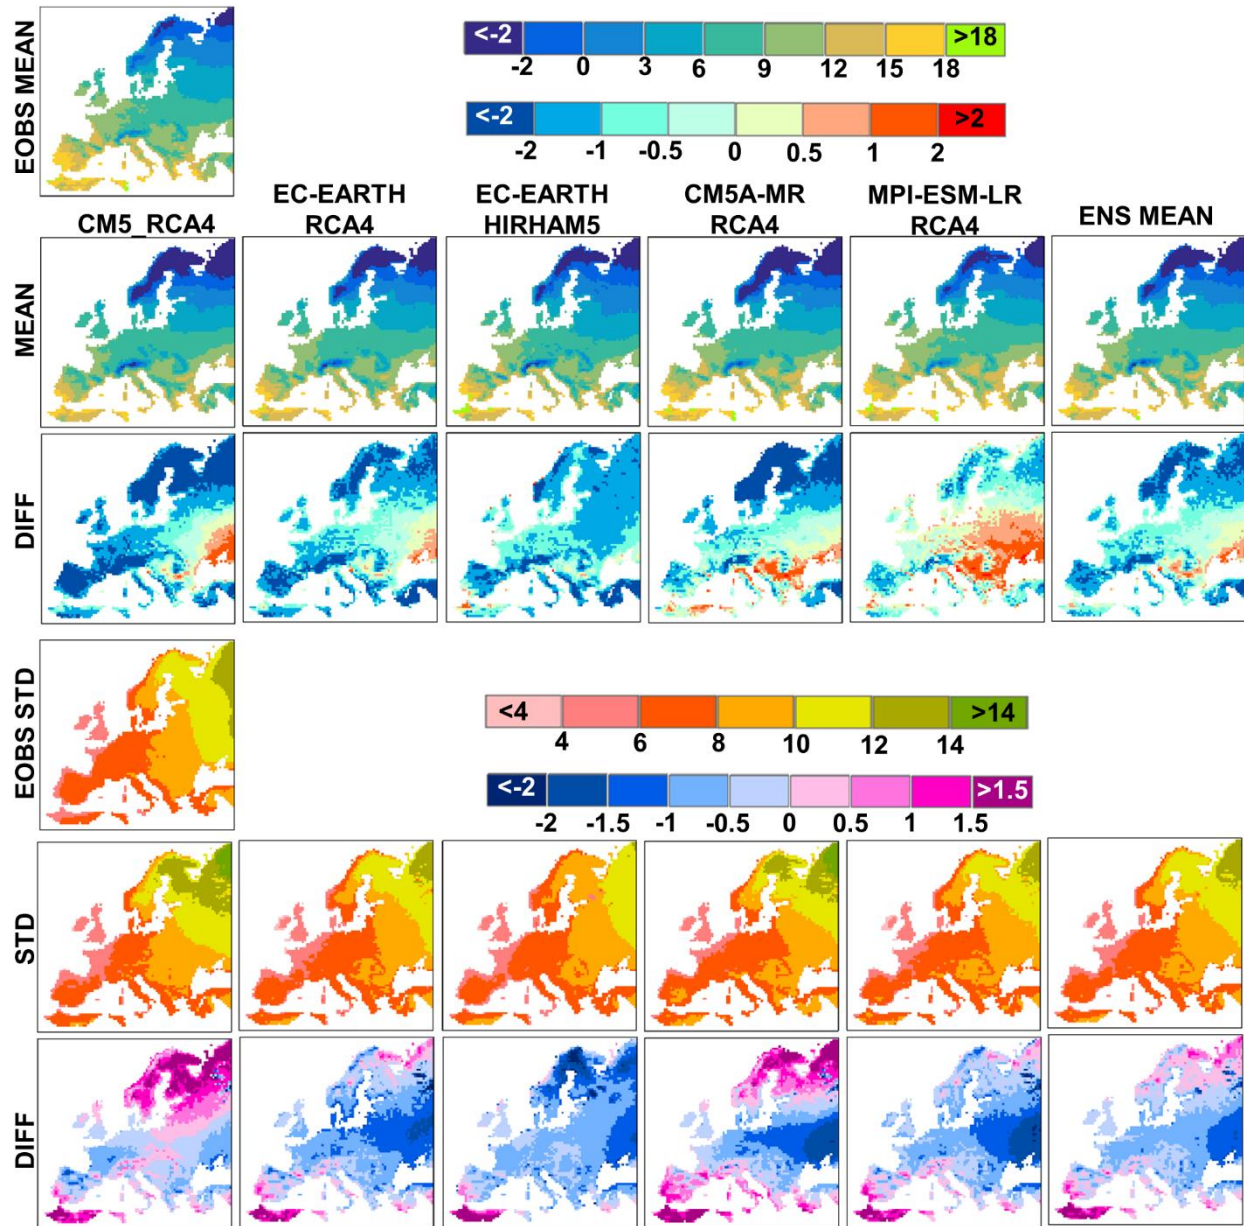

**Figure ESM 1:** Mean temperature of the EObs (first line) and for each RCM model (second line) for the reference period 1951-2005. The long term average difference (DIFF) between individual models and EObs are shown in the third line. The last column shows the ensemble mean of each line. Different color maps are provided for the MEAN panels (1st and 2nd line) and the DIFF (3rd line). Lines 4, 5, 6 are similar to 1 2 and 3 but for standard deviation.

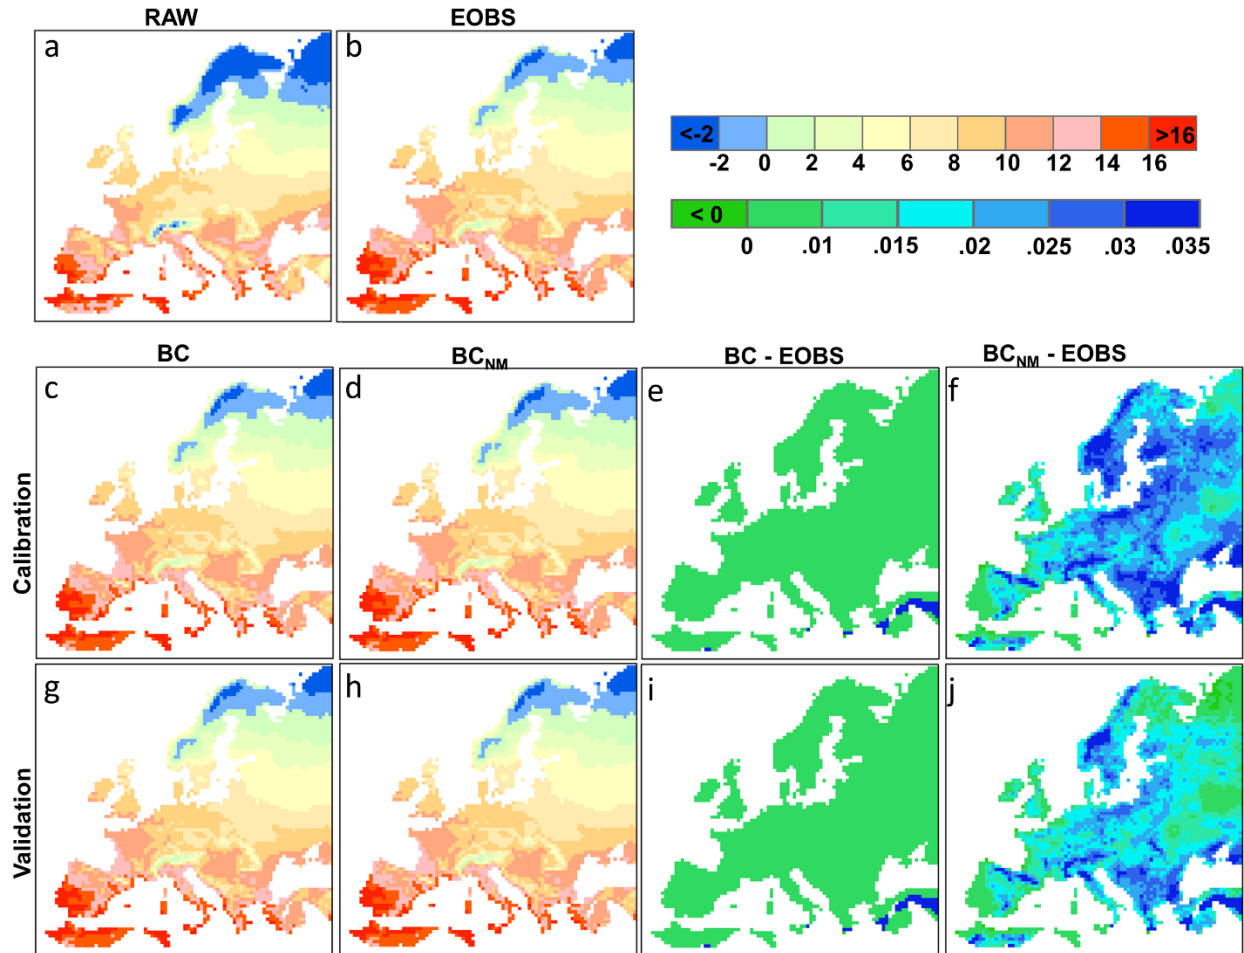

**Figure ESM 2: Mean surface temperature of the cross validation test. Panels a and b show the ensemble mean of the 5 raw models data and the EOBS respectively. Panels c and d show the ensemble mean of the 5 RCM models after the correction with and without the NM module respectively, for the calibration periods' data. Panels e and f show the difference of the c and d panels for the EOBS, respectively, Panels g to j are the same as c to f but for the validation periods' data.**
